# Supplementary material for: WIPI2 depletion inhibits the growth of hepatocellular carcinoma cells through the AMPK signaling pathway
Source: PubMed Central journal article supplement — Oncol Rep. 2020 Mar 4;43(5):1467–78. doi: 10.3892/or.2020.7531 (PMC7107944; doi:10.3892/or.2020.7531), 2020-03-04
Supplement: Supplementary_Data.pdf [file Supplementary_Data.pdf]

Table SI. Differentially expressed proteins in the Hep3B/KD cells compared with the Hep3B/NC cells.

| Gene symbol       | Effect of change | Fold change | P-value     |
|-------------------|------------------|-------------|-------------|
| <i>HIST2H2AA3</i> | Down             | -1.37182    | 5.67058E-05 |
| <i>HIST2H2AA4</i> | Down             | -1.37182    | 5.67058E-05 |
| <i>TMEM19</i>     | Down             | -1.4459193  | 0.001373594 |
| <i>PNMA2</i>      | Down             | -1.5560553  | 0.001116705 |
| <i>SLC9A6</i>     | Down             | -1.7045075  | 9.89097E-06 |
| <i>AMOTL1</i>     | Down             | -1.3772317  | 0.000133181 |
| <i>AQP3</i>       | Down             | -1.4129851  | 0.000191273 |
| <i>H2AFV</i>      | Down             | -1.342085   | 0.000122071 |
| <i>SERPINE1</i>   | Down             | -1.3901134  | 0.000940353 |
| <i>HIST1H2BJ</i>  | Down             | -2.3048773  | 1.34605E-05 |
| <i>GIT2</i>       | Down             | -1.3006763  | 0.000442315 |
| <i>LSM5</i>       | Down             | -1.4904279  | 0.000536249 |
| <i>STAM</i>       | Down             | -1.3274238  | 3.74851E-05 |
| <i>GXYLT1</i>     | Down             | -1.6361399  | 0.004261592 |
| <i>PTPRJ</i>      | Down             | -1.4555647  | 3.59775E-05 |
| <i>RECK</i>       | Down             | -1.5073851  | 0.001110072 |
| <i>CLNS1A</i>     | Down             | -1.5634793  | 0.000628026 |
| <i>FAM108C1</i>   | Down             | -1.3057765  | 0.004031888 |
| <i>VEGFB</i>      | Down             | -1.452882   | 3.11221E-05 |
| <i>DCAF6</i>      | Down             | -1.3443216  | 0.000339067 |
| <i>KIAA1671</i>   | Down             | -1.3348737  | 0.001230842 |
| <i>BIN1</i>       | Down             | -1.44755    | 0.000359521 |
| <i>NEK7</i>       | Down             | -1.4664574  | 0.001367264 |
| <i>TMX1</i>       | Down             | -1.5060985  | 0.000135843 |
| <i>MOB4</i>       | Down             | -1.5714113  | 0.001202454 |
| <i>PFKFB2</i>     | Down             | -1.5253017  | 0.000102238 |
| <i>DAG1</i>       | Down             | -1.6286423  | 0.00012327  |
| <i>TMED10</i>     | Down             | -1.8581343  | 4.87216E-05 |
| <i>KIF3B</i>      | Down             | -1.4097191  | 0.0005558   |
| <i>HPCAL1</i>     | Down             | -1.3014216  | 7.9626E-05  |
| <i>OSBPL8</i>     | Down             | -1.370526   | 0.003316887 |
| <i>KIF3C</i>      | Down             | -1.4620849  | 0.000347001 |
| <i>HNRNPA0</i>    | Down             | -1.3922285  | 0.00161312  |
| <i>HSPE1-MOB4</i> | Down             | -1.5714113  | 0.001202454 |
| <i>DLX2</i>       | Down             | -1.6198496  | 9.21066E-06 |
| <i>ARF3</i>       | Down             | -2.012423   | 5.88326E-06 |
| <i>CD59</i>       | Down             | -1.321966   | 7.80704E-05 |
| <i>SRSF1</i>      | Down             | -1.3080832  | 0.000114371 |
| <i>COPS2</i>      | Down             | -1.3461186  | 6.70258E-05 |
| <i>SEPHS1</i>     | Down             | -1.3227257  | 0.0015156   |
| <i>LXN</i>        | Down             | -1.3001955  | 0.022424433 |
| <i>UVRAG</i>      | Down             | -1.3990698  | 0.000670983 |
| <i>SOBP</i>       | Down             | -1.4806559  | 0.001065958 |
| <i>HELZ</i>       | Down             | -1.3852427  | 3.67884E-05 |
| <i>PTEN</i>       | Down             | -1.383153   | 0.000447387 |
| <i>RNF182</i>     | Down             | -1.5335923  | 0.002431604 |
| <i>FAM168B</i>    | Down             | -1.3369589  | 0.000171129 |
| <i>PTGES</i>      | Down             | -1.3259237  | 1.29228E-05 |
| <i>MAP1LC3B</i>   | Down             | -1.5135746  | 0.000484682 |
| <i>CLDND1</i>     | Down             | -1.3955233  | 0.02112282  |
| <i>AGAP1</i>      | Down             | -1.347604   | 0.000189941 |
| <i>EMC10</i>      | Down             | -1.3532999  | 0.001006392 |
| <i>RBBP5</i>      | Down             | -1.3246915  | 0.001374175 |
| <i>STX2</i>       | Down             | -1.5648973  | 0.000427796 |
| <i>LYN</i>        | Down             | -1.4738129  | 0.001652985 |
| <i>RAB4A</i>      | Down             | -1.5170394  | 0.000368804 |
| <i>ZDHHC7</i>     | Down             | -1.4209862  | 6.75068E-06 |
| <i>VEZT</i>       | Down             | -1.5309045  | 0.000374322 |
| <i>MAPK1IP1L</i>  | Down             | -1.3069487  | 0.004239525 |

Table SI. Continued.

| Gene symbol         | Effect of change | Fold change | P-value     |
|---------------------|------------------|-------------|-------------|
| <i>ARHGEF9</i>      | Down             | -1.472324   | 7.07231E-05 |
| <i>HIST2H2BE</i>    | Down             | -1.4127464  | 0.000391209 |
| <i>USP22</i>        | Down             | -1.3525349  | 0.000855179 |
| <i>LIN54</i>        | Down             | -1.3730737  | 0.000379304 |
| <i>VOPP1</i>        | Down             | -1.4756165  | 0.001254934 |
| <i>SSU72</i>        | Down             | -1.5817152  | 0.000852888 |
| <i>HIST1H2AC</i>    | Down             | -1.3612778  | 0.000317913 |
| <i>HIST1H2AD</i>    | Down             | -1.5839524  | 0.000290544 |
| <i>ABTB1</i>        | Down             | -1.3146389  | 0.002017252 |
| <i>LANCL1</i>       | Down             | -1.3599246  | 0.000180018 |
| <i>GJC1</i>         | Down             | -1.3865935  | 0.000534241 |
| <i>DOM3Z</i>        | Down             | -1.3338255  | 0.000584979 |
| <i>C3orf58</i>      | Down             | -1.8198737  | 0.002374118 |
| <i>LOC100652858</i> | Down             | -1.3842444  | 0.000632248 |
| <i>PKD2</i>         | Down             | -1.3457072  | 0.000368632 |
| <i>GATAD2A</i>      | Down             | -1.5418241  | 0.010367152 |
| <i>AP3D1</i>        | Down             | -1.3183928  | 0.002122366 |
| <i>TRIM29</i>       | Down             | -1.3003715  | 6.61863E-05 |
| <i>HIST1H2BH</i>    | Down             | -1.4193206  | 0.007444501 |
| <i>SPHAR</i>        | Down             | -1.5170394  | 0.000368804 |
| <i>TRIM24</i>       | Down             | -1.314818   | 0.000573003 |
| <i>TRIM23</i>       | Down             | -1.4491132  | 0.000519944 |
| <i>RAB31</i>        | Down             | -1.448558   | 0.000278579 |
| <i>CHML</i>         | Down             | -1.3656325  | 0.001798067 |
| <i>SLC16A6</i>      | Down             | -1.4055703  | 0.000108302 |
| <i>BNC2</i>         | Down             | -1.3367316  | 0.002330823 |
| <i>MAPK14</i>       | Down             | -1.3366501  | 0.00952509  |
| <i>PTP4A1</i>       | Down             | -1.3752989  | 0.004646592 |
| <i>TP53INP1</i>     | Down             | -1.3236756  | 0.000291744 |
| <i>LOC100507575</i> | Down             | -1.401236   | 0.000737036 |
| <i>SLC44A1</i>      | Down             | -1.3654499  | 7.00674E-05 |
| <i>SEPT2</i>        | Down             | -1.5397661  | 0.000586209 |
| <i>ARNT2</i>        | Down             | -1.6924354  | 0.004664624 |
| <i>DSTYK</i>        | Down             | -1.3259174  | 0.005989519 |
| <i>SLC7A5</i>       | Down             | -1.3004359  | 0.00060943  |
| <i>STARD7</i>       | Down             | -1.4295951  | 2.42317E-05 |
| <i>ELOVL5</i>       | Down             | -1.4447501  | 0.000134781 |
| <i>AAK1</i>         | Down             | -1.3378531  | 0.000317477 |
| <i>PRKACA</i>       | Down             | -1.3993351  | 1.49009E-05 |
| <i>ASPH</i>         | Down             | -1.4125004  | 0.002391845 |
| <i>ZNF445</i>       | Down             | -1.3575029  | 0.00240462  |
| <i>HADH</i>         | Down             | -1.4839163  | 1.9668E-05  |
| <i>IFRD2</i>        | Down             | -1.4405876  | 2.93615E-05 |
| <i>INSR</i>         | Down             | -1.3842958  | 0.002982526 |
| <i>HHIPL2</i>       | Down             | -1.3620915  | 0.000362884 |
| <i>RBL2</i>         | Down             | -1.4216489  | 0.001491622 |
| <i>TACC1</i>        | Down             | -1.4641591  | 0.000158919 |
| <i>NEBL</i>         | Down             | -1.3458067  | 0.000166199 |
| <i>IGSF3</i>        | Down             | -1.4666505  | 0.000501942 |
| <i>HIST1H4L</i>     | Down             | -1.432762   | 0.016226895 |
| <i>HIST1H4K</i>     | Down             | -1.432762   | 0.016226895 |
| <i>DERL1</i>        | Down             | -1.4254267  | 0.00133479  |
| <i>SSH2</i>         | Down             | -1.4069567  | 9.10385E-05 |
| <i>CTPS1</i>        | Down             | -1.5185575  | 3.09338E-05 |
| <i>ITGB1</i>        | Down             | -1.3755273  | 0.000450005 |
| <i>OAZ2</i>         | Down             | -1.6617217  | 0.001252478 |
| <i>TASP1</i>        | Down             | -1.3693696  | 3.95453E-05 |
| <i>FOXQ1</i>        | Down             | -1.4441863  | 0.000243162 |
| <i>HIST1H4A</i>     | Down             | -1.432762   | 0.016226895 |

Table SI. Continued.

| Gene symbol         | Effect of change | Fold change | P-value     |
|---------------------|------------------|-------------|-------------|
| <i>HIST1H4B</i>     | Down             | -1.432762   | 0.016226895 |
| <i>HIST1H4E</i>     | Down             | -1.432762   | 0.016226895 |
| <i>TEF</i>          | Down             | -1.3211092  | 0.000355249 |
| <i>HIST1H4F</i>     | Down             | -1.432762   | 0.016226895 |
| <i>HIST1H4C</i>     | Down             | -1.432762   | 0.016226895 |
| <i>HIST1H4D</i>     | Down             | -1.432762   | 0.016226895 |
| <i>B3GNT2</i>       | Down             | -1.3035     | 0.014655483 |
| <i>ENTPD4</i>       | Down             | -1.4314753  | 0.004720747 |
| <i>HIST1H4I</i>     | Down             | -1.432762   | 0.016226895 |
| <i>B4GALT6</i>      | Down             | -1.5287665  | 0.002719276 |
| <i>UBE2D1</i>       | Down             | -1.4852414  | 0.000536797 |
| <i>HIST1H4J</i>     | Down             | -1.432762   | 0.016226895 |
| <i>HIST1H4H</i>     | Down             | -1.432762   | 0.016226895 |
| <i>B4GALT1</i>      | Down             | -1.3401494  | 1.11681E-05 |
| <i>HIST1H3J</i>     | Down             | -1.6074306  | 0.000213177 |
| <i>LOC100287223</i> | Down             | -1.4555647  | 3.59775E-05 |
| <i>REEP1</i>        | Down             | -1.5749543  | 0.001906328 |
| <i>NR4A3</i>        | Down             | -1.4445372  | 0.000539192 |
| <i>WIP12</i>        | Down             | -1.3620391  | 0.000793815 |
| <i>PPIF</i>         | Down             | -1.5818852  | 6.73694E-06 |
| <i>LOC100653189</i> | Down             | -1.3842444  | 0.000632248 |
| <i>PLEKHA3</i>      | Down             | -1.6101476  | 0.000873142 |
| <i>TET3</i>         | Down             | -1.5425655  | 0.001222944 |
| <i>MYO10</i>        | Down             | -1.5156685  | 0.00055573  |
| <i>DIO2</i>         | Down             | -1.9261419  | 7.96395E-06 |
| <i>HIST1H3A</i>     | Down             | -1.6074306  | 0.000213177 |
| <i>HIST1H3B</i>     | Down             | -1.6074306  | 0.000213177 |
| <i>HIST1H3C</i>     | Down             | -1.6074306  | 0.000213177 |
| <i>HIST1H3D</i>     | Down             | -1.6074306  | 0.000213177 |
| <i>HIST1H3E</i>     | Down             | -1.6074306  | 0.000213177 |
| <i>HIST1H3F</i>     | Down             | -1.6074306  | 0.000213177 |
| <i>SMC1A</i>        | Down             | -1.5257125  | 0.000121713 |
| <i>HIST1H3G</i>     | Down             | -1.6074306  | 0.000213177 |
| <i>HIST1H3H</i>     | Down             | -1.6074306  | 0.000213177 |
| <i>HIST1H3I</i>     | Down             | -1.6074306  | 0.000213177 |
| <i>HIST4H4</i>      | Down             | -1.432762   | 0.016226895 |
| <i>SGPP1</i>        | Down             | -1.4370948  | 0.003009267 |
| <i>CLSTN1</i>       | Down             | -1.7213849  | 1.93999E-05 |
| <i>PAWR</i>         | Down             | -1.3284928  | 0.000563364 |
| <i>AMMECR1</i>      | Down             | -1.667316   | 9.03393E-05 |
| <i>HIST2H4A</i>     | Down             | -1.432762   | 0.016226895 |
| <i>CXADR</i>        | Down             | -1.3101225  | 0.012799084 |
| <i>HIST2H4B</i>     | Down             | -1.432762   | 0.016226895 |
| <i>RAET1G</i>       | Down             | -1.3531115  | 0.003535511 |
| <i>HMOX1</i>        | Down             | -1.5142689  | 0.001203859 |
| <i>RAET1L</i>       | Down             | -1.3531115  | 0.003535511 |
| <i>MGLL</i>         | Down             | -1.3923712  | 7.85631E-05 |
| <i>MSN</i>          | Down             | -1.4259092  | 6.232E-05   |
| <i>PPP1R14C</i>     | Down             | -1.384155   | 0.009065013 |
| <i>AKT2</i>         | Down             | -1.3371891  | 0.000208266 |
| <i>UBE2A</i>        | Down             | -1.3709927  | 0.000420888 |
| <i>ACADM</i>        | Down             | -1.3919108  | 0.000166014 |
| <i>ALDH5A1</i>      | Down             | -1.5549151  | 0.001758928 |
| <i>TIFA</i>         | Down             | -1.4630783  | 0.023580443 |
| <i>MBNL1</i>        | Down             | -1.6192331  | 0.003479082 |
| <i>TMEM245</i>      | Down             | -1.3363726  | 0.001550311 |
| <i>ISCA1</i>        | Down             | -1.436574   | 6.44692E-05 |
| <i>SDC1</i>         | Down             | -1.4717805  | 0.000290883 |
| <i>MAGT1</i>        | Down             | -1.4829828  | 0.001527422 |

Table SI. Continued.

| Gene symbol           | Effect of change | Fold change | P-value     |
|-----------------------|------------------|-------------|-------------|
| <i>KIF1B</i>          | Down             | -1.3321264  | 0.000117451 |
| <i>ULBP2</i>          | Down             | -1.3531115  | 0.003535511 |
| <i>KPNA3</i>          | Down             | -1.403307   | 0.002639797 |
| <i>LUM</i>            | Down             | -2.1627452  | 0.001336538 |
| <i>PPM1A</i>          | Down             | -1.4600227  | 0.002316781 |
| <i>KITLG</i>          | Down             | -1.5602343  | 0.00032742  |
| <i>DCN</i>            | Down             | -1.3046162  | 0.000978438 |
| <i>SEC62</i>          | Down             | -1.3691652  | 0.001088112 |
| <i>CALML4</i>         | Down             | -1.364446   | 0.001892427 |
| <i>TMEM33</i>         | Down             | -1.4537312  | 0.000378766 |
| <i>SEC22B</i>         | Down             | -1.441633   | 0.000899207 |
| <i>CYBASC3</i>        | Down             | -1.4420793  | 0.000269879 |
| <i>LIPA</i>           | Down             | -1.401236   | 0.000737036 |
| <i>KAT2B</i>          | Down             | -1.3938793  | 9.59198E-05 |
| <i>C6orf89</i>        | Down             | -1.3685281  | 0.000259633 |
| <i>FZD10</i>          | Down             | -1.5844405  | 0.000562307 |
| <i>ID2</i>            | Down             | -1.540867   | 0.004376103 |
| <i>DR1</i>            | Down             | -1.3521508  | 0.00460049  |
| <i>WSB2</i>           | Down             | -1.4110974  | 0.000955695 |
| <i>GDF11</i>          | Down             | -1.4627866  | 5.48459E-05 |
| <i>ALKBH5</i>         | Down             | -1.3842444  | 0.000632248 |
| <i>CBS</i>            | Down             | -1.3234975  | 0.000865493 |
| <i>GPR126</i>         | Up               | 1.3507925   | 0.003545519 |
| <i>DZIP1</i>          | Up               | 1.3811926   | 0.000513606 |
| <i>ZNF321P</i>        | Up               | 1.413191    | 0.001478913 |
| <i>CTGF</i>           | Up               | 1.7613876   | 2.91823E-05 |
| <i>PRRT1</i>          | Up               | 1.34764     | 0.00024553  |
| <i>MAP3K8</i>         | Up               | 1.3766054   | 0.001558255 |
| <i>DOC2A</i>          | Up               | 1.359193    | 0.002382447 |
| <i>F3</i>             | Up               | 1.426257    | 2.67506E-05 |
| <i>WFDC3</i>          | Up               | 1.3443601   | 0.004112941 |
| <i>ASZ1</i>           | Up               | 1.6095357   | 0.001101742 |
| <i>SERPINH1</i>       | Up               | 1.3350375   | 0.00011344  |
| <i>CAMLG</i>          | Up               | 1.304223    | 0.00154913  |
| <i>GART</i>           | Up               | 1.3082745   | 0.000410891 |
| <i>NIPSNAP1</i>       | Up               | 1.3033056   | 0.003699186 |
| <i>RGS7</i>           | Up               | 1.5406768   | 0.000143065 |
| <i>BMP5</i>           | Up               | 1.4196317   | 0.000855665 |
| <i>WASF1</i>          | Up               | 1.3322054   | 0.02189683  |
| <i>CYR61</i>          | Up               | 1.6803367   | 1.21799E-05 |
| <i>IP6K2</i>          | Up               | 1.3430773   | 0.001096787 |
| <i>GTF2H3</i>         | Up               | 1.3717024   | 0.001531128 |
| <i>KLRG1</i>          | Up               | 1.4026812   | 0.001182361 |
| <i>PSG5</i>           | Up               | 1.3279887   | 0.000184053 |
| <i>SERP1</i>          | Up               | 1.3677367   | 0.000482838 |
| <i>ZNF816-ZNF321P</i> | Up               | 1.413191    | 0.001478913 |
| <i>IL6</i>            | Up               | 1.4825044   | 0.000913129 |
| <i>MEX3A</i>          | Up               | 1.3011888   | 0.00559471  |
| <i>FAM165B</i>        | Up               | 1.3311284   | 0.04505998  |
| <i>MEOX1</i>          | Up               | 1.4095151   | 0.006847956 |
| <i>SLC50A1</i>        | Up               | 1.3586274   | 0.000233796 |
| <i>SLFN12</i>         | Up               | 1.4701191   | 0.001964173 |
| <i>BIK</i>            | Up               | 1.4809011   | 0.000327102 |
| <i>TUFT1</i>          | Up               | 1.3271273   | 0.006555307 |
| <i>CBX5</i>           | Up               | 1.320757    | 0.002443153 |
| <i>C6orf57</i>        | Up               | 1.3449835   | 0.03827391  |
| <i>IL1A</i>           | Up               | 1.4777228   | 0.000614268 |
| <i>BCL10</i>          | Up               | 1.3139063   | 0.023471981 |
| <i>IQCK</i>           | Up               | 1.3294736   | 2.22767E-05 |

Table SI. Continued.

| Gene symbol         | Effect of change | Fold change | P-value     |
|---------------------|------------------|-------------|-------------|
| <i>ZNF816</i>       | Up               | 1.413191    | 0.001478913 |
| <i>HLA-F</i>        | Up               | 1.3162881   | 0.003183266 |
| <i>OGFRL1</i>       | Up               | 1.38813     | 0.046892077 |
| <i>NMNAT1</i>       | Up               | 1.4188741   | 0.000169741 |
| <i>MEST</i>         | Up               | 1.3143299   | 0.002501523 |
| <i>LOC100507547</i> | Up               | 1.34764     | 0.00024553  |
| <i>PSMB9</i>        | Up               | 1.4460064   | 0.000405659 |
| <i>RAP1A</i>        | Up               | 2.2014196   | 7.60379E-08 |
| <i>YIPF4</i>        | Up               | 1.3359233   | 0.001250093 |
| <i>CPT2</i>         | Up               | 1.4308985   | 0.000470527 |
| <i>IFI44L</i>       | Up               | 1.4099203   | 0.000651286 |
| <i>FRMD3</i>        | Up               | 1.3140365   | 0.001707995 |
| <i>KLHL28</i>       | Up               | 1.37372     | 0.038772605 |
| <i>ZNF91</i>        | Up               | 1.5537021   | 0.001009226 |
| <i>PCDHGB3</i>      | Up               | 1.3502897   | 0.000182825 |
| <i>PLLP</i>         | Up               | 1.5611061   | 0.000192737 |
| <i>LEPREL1</i>      | Up               | 1.3103751   | 0.000296033 |
| <i>DNAH2</i>        | Up               | 1.3111426   | 0.007019857 |
| <i>TPM1</i>         | Up               | 1.3465065   | 0.00015215  |
| <i>COL9A3</i>       | Up               | 1.4199182   | 0.000158482 |
| <i>RASGRP1</i>      | Up               | 1.476049    | 0.000348323 |
| <i>OLR1</i>         | Up               | 1.4691945   | 0.000510733 |
| <i>TMC5</i>         | Up               | 1.4350634   | 0.000994652 |
| <i>ANXA3</i>        | Up               | 1.374357    | 0.001030875 |
| <i>IFIT2</i>        | Up               | 1.397796    | 0.001837246 |
| <i>IGFBP3</i>       | Up               | 2.049757    | 3.05079E-05 |

Hep3B/KD cells, Hep3B cells transected with si-WIPI2; Hep3B/NC cells, Hep3B cells transected with the si-NC (negative control).
